# Supplementary material for: A synergistic heterogeneous interface of a NC-Co-MoS2/CC-450 electrocatalyst for efficient alkaline hydrogen evolution
Source: Royal Society of Chemistry journal article supplement (doi:10.1039/d3nj01596c), 2023-01-01
Supplement: d3nj01596c1.pdf [file d3nj01596c1.pdf]

1 **Supporting information**

2 **A synergistic heterogeneous interface of a NC-Co-MoS<sub>2</sub>/CC-450 electrocatalyst**  
3 **for efficient alkaline hydrogen evolution**

4 Kaiqi zhang<sup>a</sup>, Hequn Wu<sup>a</sup>, Guanghui Xiong<sup>a</sup>, Weifeng Yao<sup>a, b, c\*</sup>

5 <sup>a</sup> Shanghai Key Laboratory of Materials Protection and Advanced Materials in Electric  
6 Power, College of Environmental & Chemical Engineering, Shanghai University of  
7 Electric Power, Shanghai, P. R. China.

8 <sup>b</sup> Shanghai Institute of Pollution Control and Ecological Security, Shanghai, PR  
9 China.

10 <sup>c</sup> Shanghai Engineering Research Center of Heat-exchange System and Energy  
11 Saving, Shanghai University of Electric Power, Shanghai, PR China

12

13 \*Corresponding author E-mail address: [yaoweifeng@shiep.edu.cn](mailto:yaoweifeng@shiep.edu.cn)

14

15 **Pretreatment of carbon cloth (CC)**

16 The carbon cloth was cut into 2 cm × 4 cm and refluxed in a mixed solution of  
17 concentrated nitric acid/concentrated sulfuric acid (60 mL) with a volume ratio of 3:1  
18 at 80 °C for 4 h to remove impurities on the surface of the carbon cloth and increase  
19 the hydrophilicity of the carbon cloth. After the solution was cooled to room  
20 temperature, the carbon cloth was removed and sonicated with acetone, ethanol, and  
21 deionized water for 10 min respectively, and then rinsed with deionized water to  
22 remove the residual acid on the surface of the carbon cloth. Finally, the carbon cloth  
23 was dried in a vacuum drying oven at 60 °C for 8 h, and then sealed and stored for  
24 use.

25 **Preparation of ZIF67**

26 First, 3 mmol (Co(NO<sub>3</sub>)<sub>2</sub>·6H<sub>2</sub>O and 25 mL of methanol were added to a 100 mL  
27 A conical flask and mixed well with constant stirring. Next, 12 mmol of  
28 2-methylimidazole and 25 mL of methanol were added to 100 mL of conical flask B  
29 and mixed with stirring to form a clear and transparent solution. Then the solution in  
30 the B conical flask was added to the A conical flask with constant stirring and stirred  
31 in a constant temperature water bath at 25 °C for 24 h. After stirring, the reaction  
32 products were collected by centrifugation and washed with methanol several times,  
33 and finally the products were placed in a vacuum drying oven at 60 °C for 12 h to  
34 obtain ZIF67, which was sealed and stored.

35 **Preparation of (NH<sub>4</sub>)<sub>2</sub>Mo<sub>3</sub>S<sub>13</sub>·2H<sub>2</sub>O**

36 (NH<sub>4</sub>)<sub>2</sub>Mo<sub>3</sub>S<sub>13</sub>·2H<sub>2</sub>O was prepared according to the method reported by previous

37 researchers<sup>1</sup>. First, 40.0 g of sulfur powder and 120 mL of ammonium sulfide solution  
38 were added to a spherical flask and mixed well to form a polysulfide ammonium  
39 solution. Then 4.0 g of  $(\text{NH}_4)_6\text{Mo}_7\text{O}_{24}\cdot 4\text{H}_2\text{O}$  was added to the above spherical flask  
40 and stirred thoroughly again. The reaction solution was heated in a condensing reflux  
41 device under an oil bath at 90 °C for 15 h with constant stirring. During the heating  
42 reaction, the dark red  $(\text{NH}_4)_2\text{Mo}_3\text{S}_{13}\cdot 2\text{H}_2\text{O}$  will be formed and precipitated  
43 continuously. At the end of the heating reaction, the spherical flask is cooled in an ice  
44 water bath, then filtered and separated, and the product is washed with carbon  
45 disulfide several times to remove the excess sulfide. Finally, the product was dried in  
46 a vacuum oven at 60 °C for 12 h, and then sealed and stored for use.

#### 47 **Preparation of Pt/C/CC**

48 A mixture of 5 mg of 20 wt.% Pt/C, 198  $\mu\text{L}$  of deionized water, 792  $\mu\text{L}$  of  
49 isopropanol and 10  $\mu\text{L}$  of Nafion reagent were formulated and sonicated for 60 min to  
50 form a uniformly dispersed ink. The prepared ink was uniformly drop-coated onto the  
51 pretreated carbon cloth (1 cm  $\times$  2 cm) and dried to obtain a Pt/C catalyst loading of  
52 about 2 mg  $\text{cm}^{-2}$ .

#### 53 **Material characterization**

54 The crystal structure of the materials was analyzed using a Bruker D8 model  
55 X-ray diffraction (XRD) instrument with a Cu target as the source of the radiation  
56 (wavelength 1.5418 Å). XRD scans ranged from 5 to 90 degrees at a rate of 5°  $\text{min}^{-1}$ .  
57 Scanning electron microscopy (SEM) as well as elemental mapping (EDS) analysis  
58 (Zeiss Gemini SEM 300) were used to observe surface morphology and composition

59 of the samples. Transmission electron microscopy (TEM) images and EDS maps were  
60 collected from a JEM-2100F model electron microscope equipped with an X-MaxN  
61 800T IE250 energy spectrometer. x-ray photoelectron spectroscopy (XPS) was  
62 performed with a Scientific K-Alpha x-ray photoelectron spectrometer from Thermo,  
63 USA, using an Al-K $\alpha$  excitation source (1486.6 eV), operating at 12 kV, to analyze  
64 the chemical valence of the elements on the surface of the sample.

### 65 **Electrochemical measurements**

66 The electrochemical experiments were carried out using a CHI660E workstation.  
67 All materials prepared in this experiment were tested using in a standard  
68 three-electrode system. The prepared electrocatalyst was used as the working  
69 electrode with a test area of 1 cm<sup>2</sup>, while the Hg/HgO electrode and the carbon rod  
70 were used as the reference and counter electrode, respectively. Before each test, the  
71 electrolyte solution of 1.0 M KOH (pH=14) was purged with argon gas for 30 min to  
72 remove the oxygen contained in the electrolyte solution, and all tests were performed  
73 at room temperature. The potential measured through the reference electrode Hg/HgO  
74 was converted to reversible hydrogen electrode potential (RHE) according to  $E_{\text{RHE}} =$   
75  $E_{\text{Hg/HgO}} + 0.098 + 0.0591\text{pH}^2$ . To evaluate the HER activity of the catalyst under  
76 alkaline conditions, linear scanning voltammetry (LSV) curves were performed at a  
77 scan rate of 5 mV s<sup>-1</sup> in 1.0 M KOH solution with an iR compensation of 90%. The  
78 Tafel plots were derived from their corresponding LSV curves according to the Tafel  
79 equation ( $\eta = b \log j + a$ , where  $b$  is the Tafel slope and  $j$  is the current density<sup>3</sup>). The  
80 charge transfer impedance ( $R_{\text{ct}}$ ) of the catalyst was measured by electrochemical

81 impedance spectroscopy (EIS) in the frequency range of  $10^5$  Hz to  $10^{-1}$  Hz, and  $R_{ct}$   
82 was chosen to be tested at an overpotential of 150 mV. The bilayer capacitance ( $C_{dl}$ )  
83 of the catalyst was calculated from the cyclic voltammetric curve (CV) in the  
84 non-Faraday potential region at 0.07-0.17 V vs. RHE. CV measurements were  
85 performed at scan rates of  $10 \sim 50$  mV  $s^{-1}$  to calculate the double-layer capacitances  
86 ( $C_{dl}$ ) of the prepared catalysts, which was used to evaluate the electrochemically  
87 active surface area (ECSA) of the prepared catalysts ( $ECSA \approx C_{dl}/C_s$ ,  $C_s = 0.04$  mF  
88  $cm^{-2}$ )<sup>4</sup>. The Faraday efficiency (FE) of the electrocatalyst for hydrogen precipitation  
89 was tested by the drainage gas collection method with a test area of  $1.0$   $cm^2$ .  
90 calculations were performed according to the Faraday efficiency formula<sup>5</sup>:  $FE =$   
91  $(V/V_m)/[(I \times t)/(n \times F)]$ , where  $V$  is the experimentally measured volume of hydrogen,  
92  $V_m$  is the molar volume of the gas ( $24.5$  L  $mol^{-1}$ ) at room temperature ( $25$  °C),  $I$  is the  
93 tested current of  $50$  mA,  $t$  is the tested time ( $3600$  s),  $n=2$ , is the number of electron  
94 transfer for the hydrogen evolution reaction, and  $F$  is the Faraday constant of  $96485.3$   
95 C  $mol^{-1}$ . The HER stability of the electrocatalyst in  $1.0$  M KOH solution was  
96 investigated using the chronopotentiometry (CP) method.

97

98

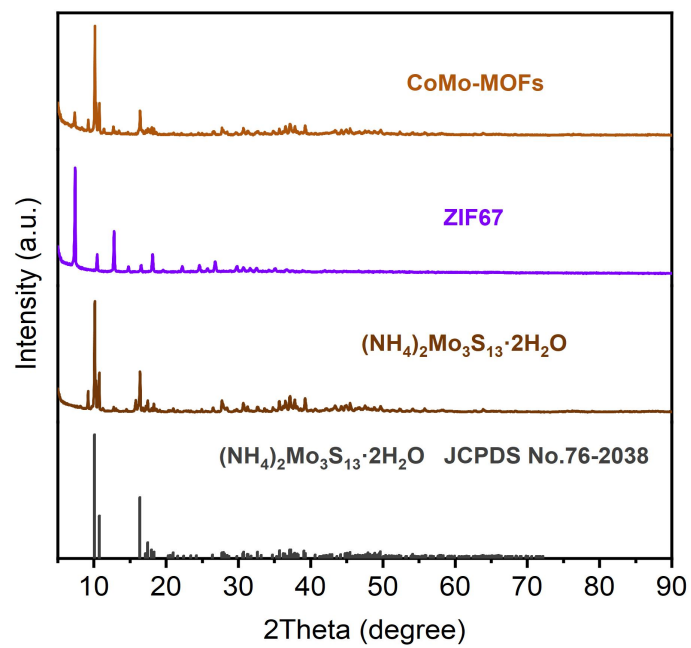

99

100 **Figure S1.** XRD patterns of CoMo-MOFs, ZIF67 and (NH<sub>4</sub>)<sub>2</sub>Mo<sub>3</sub>S<sub>13</sub>·2H<sub>2</sub>O.

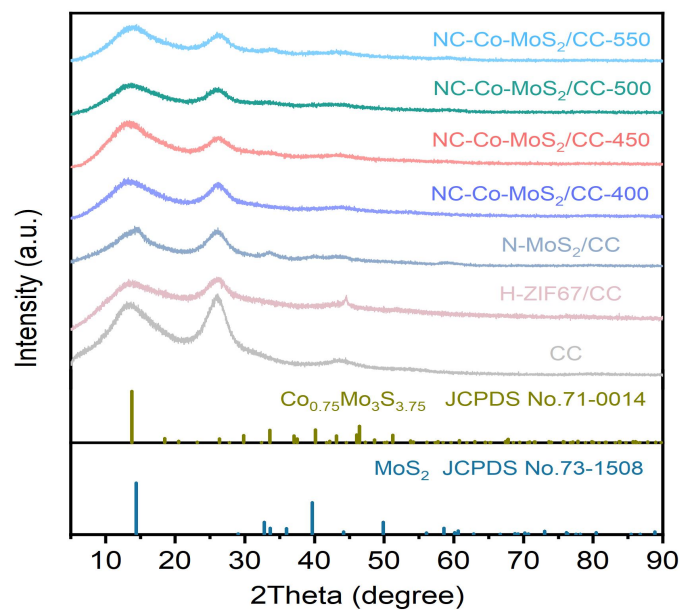

101

102 **Figure S2.** XRD patterns of NC-Co-MoS<sub>2</sub>/CC-n (n=400, 450, 500 and 550),

103 N-MoS<sub>2</sub>/CC, H-ZIF67/CC and carbon cloth (CC).

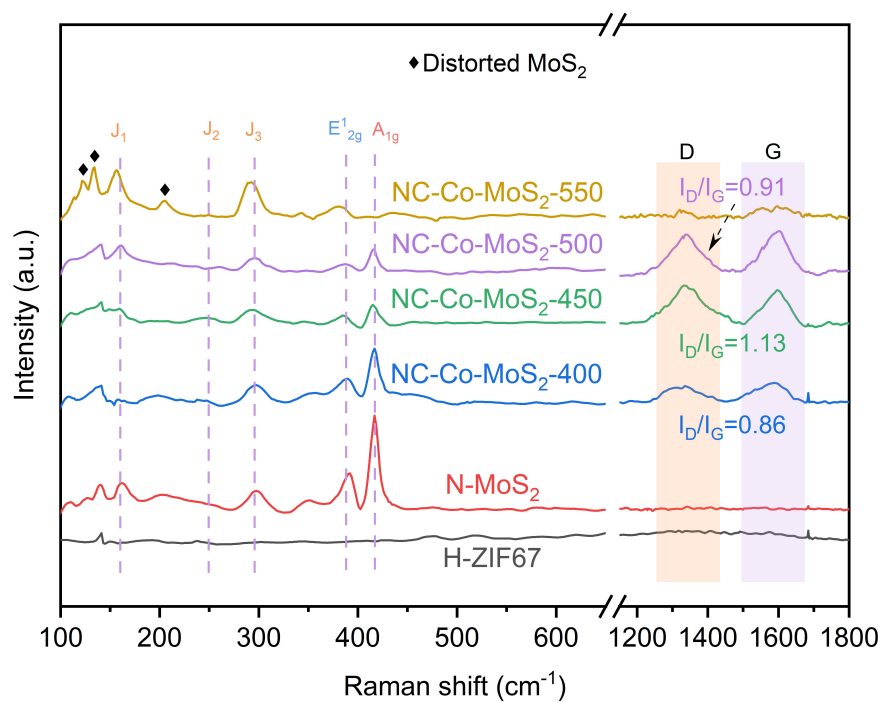

104

105 **Figure S3.** Raman patterns of NC-Co-MoS<sub>2</sub>-n (n=400, 450, 500 and 550), N-MoS<sub>2</sub>

106 and H-ZIF67.



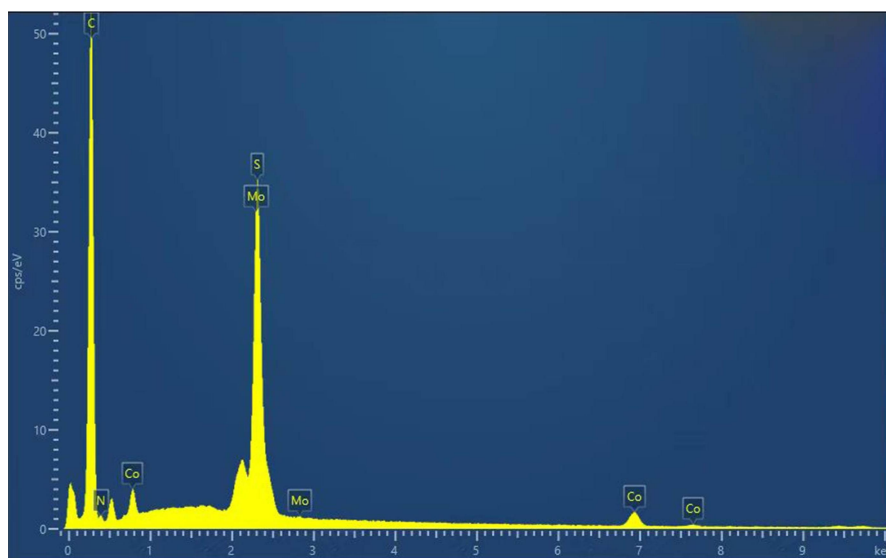

107

108 **Figure S4.** SEM EDS pattern of NC-Co-MoS<sub>2</sub>/CC-450.

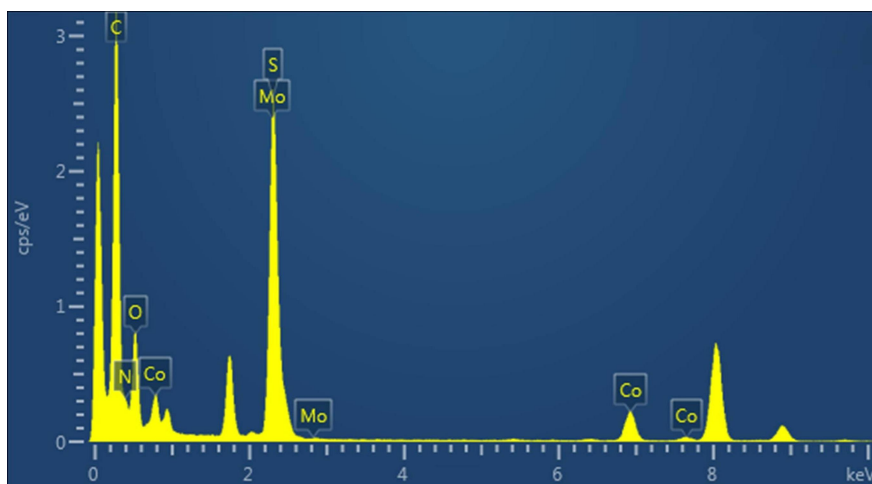

109

110 **Figure S5.** TEM EDS pattern of NC-Co-MoS<sub>2</sub>/CC-450.

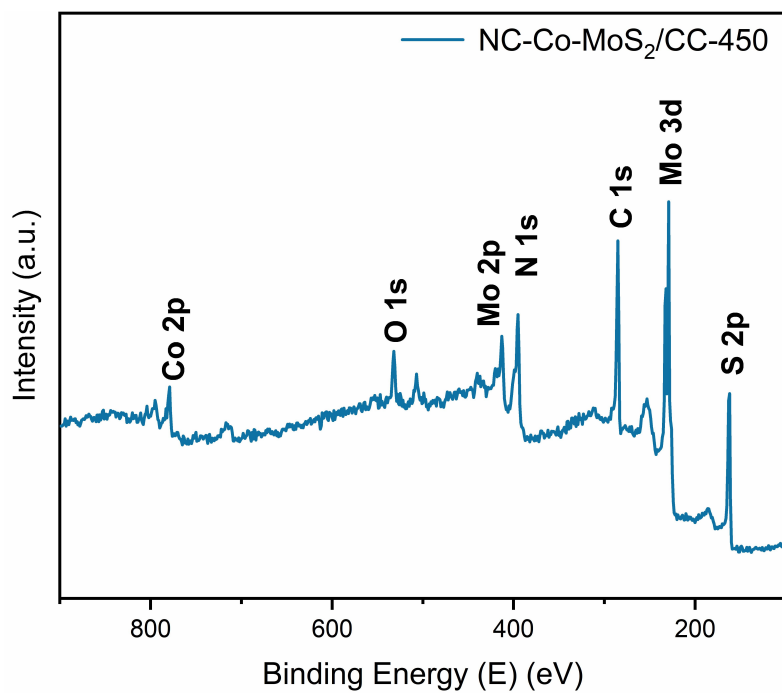

111

112 **Figure S6.** XPS surveys spectra of NC-Co-MoS<sub>2</sub>/CC-450.

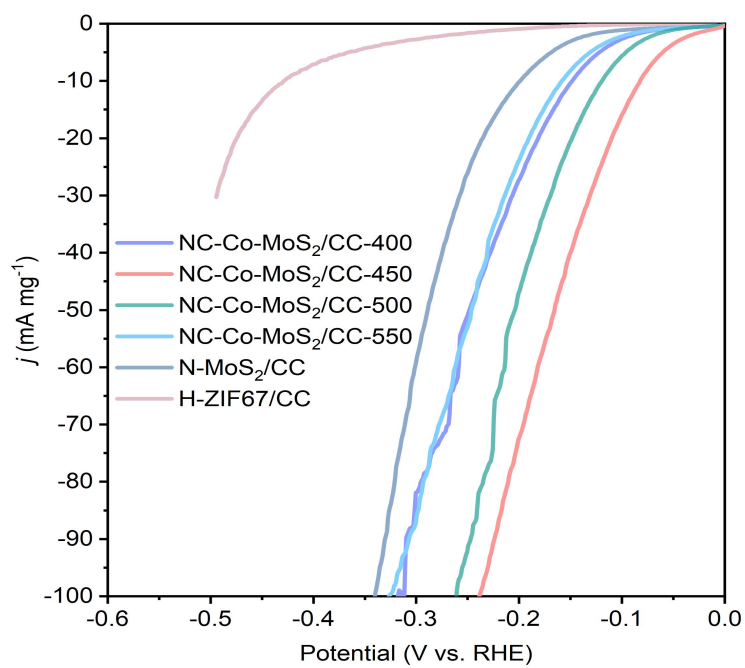

113

114 **Figure S7.** Loadings normalized current density curves for NC-Co-MoS<sub>2</sub>/CC-n

115 (n=400, 450, 500 and 550), N-MoS<sub>2</sub>/CC, H-ZIF67/CC catalysts

116

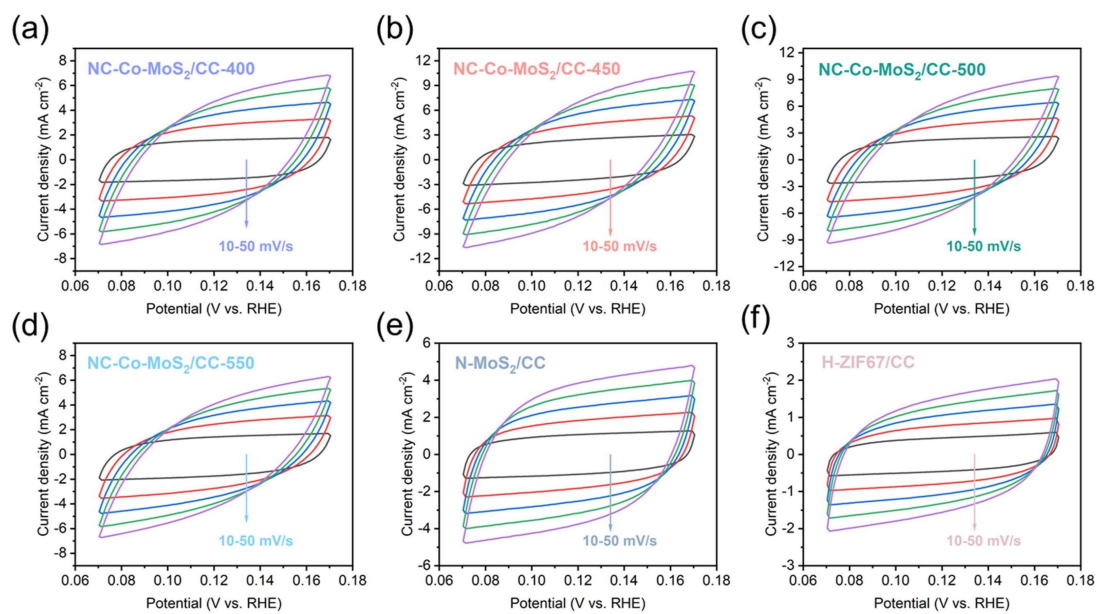

117

118 **Figure S8.** (a-d) Cyclic voltammograms of NC-Co-MoS<sub>2</sub>/CC-n (n=400, 450, 500 and

119 550), (e) N-MoS<sub>2</sub>/CC, (f) H-ZIF67/CC electrodes at 0.07-0.17 V vs. RHE.

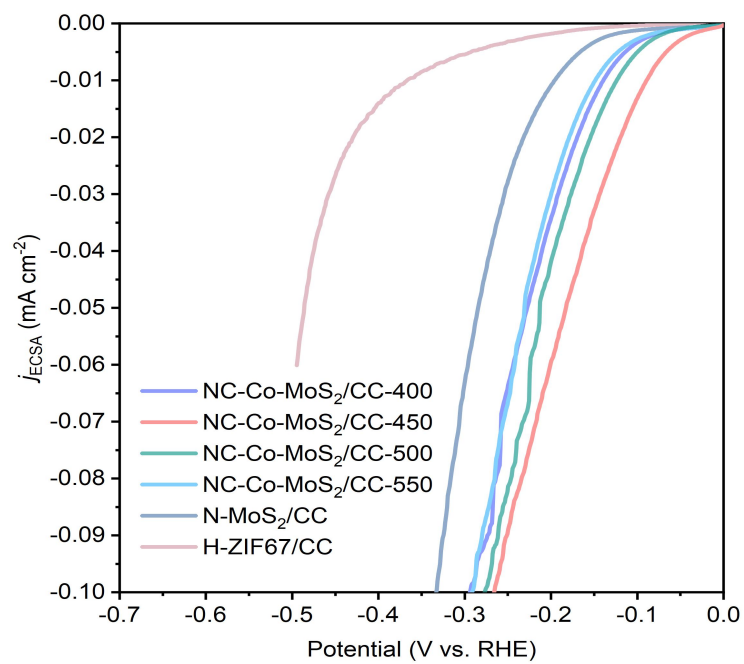

120

121 **Figure S9.** Electrochemical active area (ECSA) normalized current density curves for

122 NC-Co-MoS<sub>2</sub>/CC-n (n=400, 450, 500 and 550), N-MoS<sub>2</sub>/CC, H-ZIF67/CC catalysts.

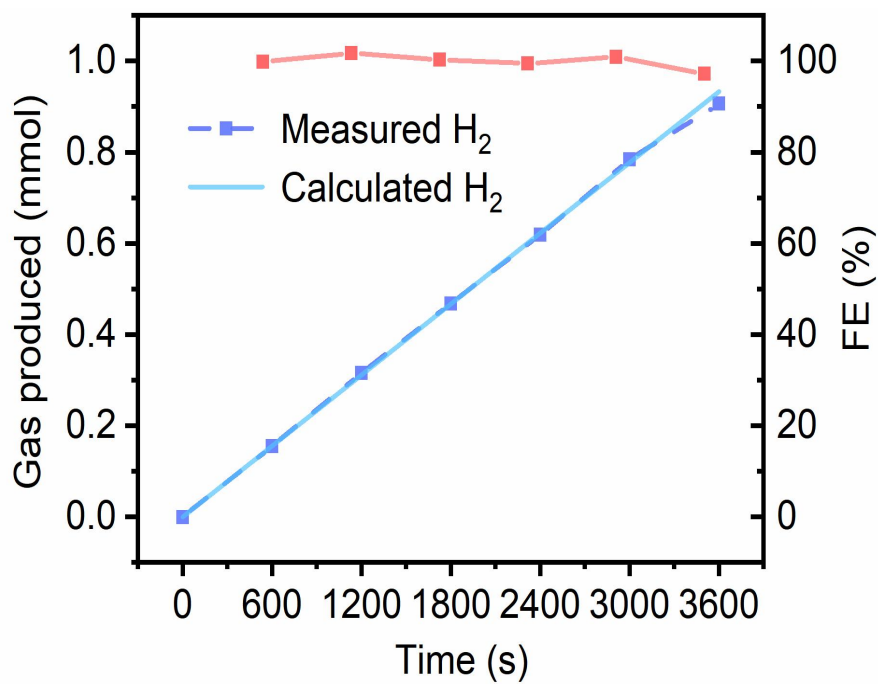

123

124 **Figure S10.** Hydrogen evolution Faraday efficiency plot for NC-Co-MoS<sub>2</sub>/CC-450  
125 electrocatalyst.

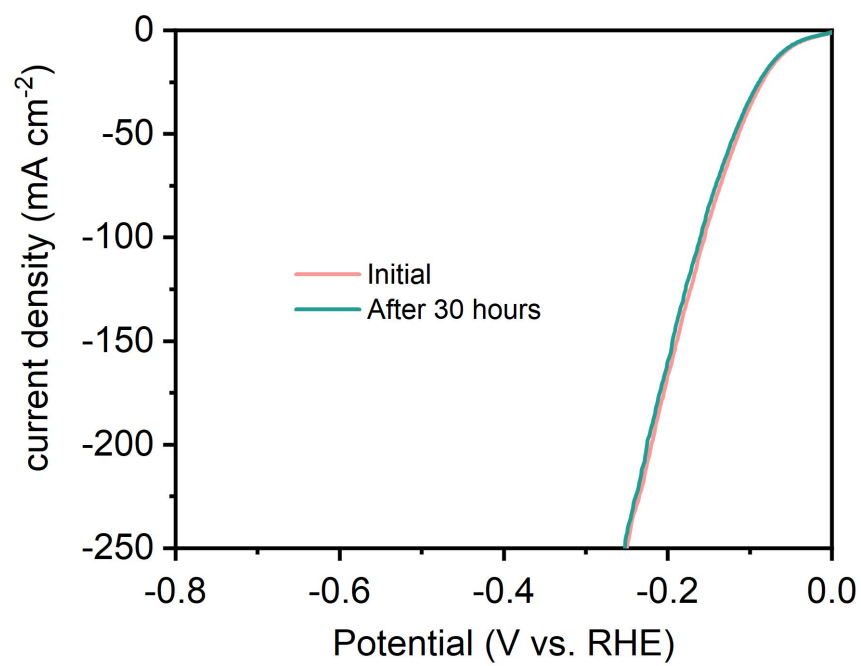

126

127 **Figure S11.** HER polarization curves of NC-Co-MoS<sub>2</sub>/CC-450 electrocatalyst before

128 and after 30 h chronopotentiometry (CP) testing.



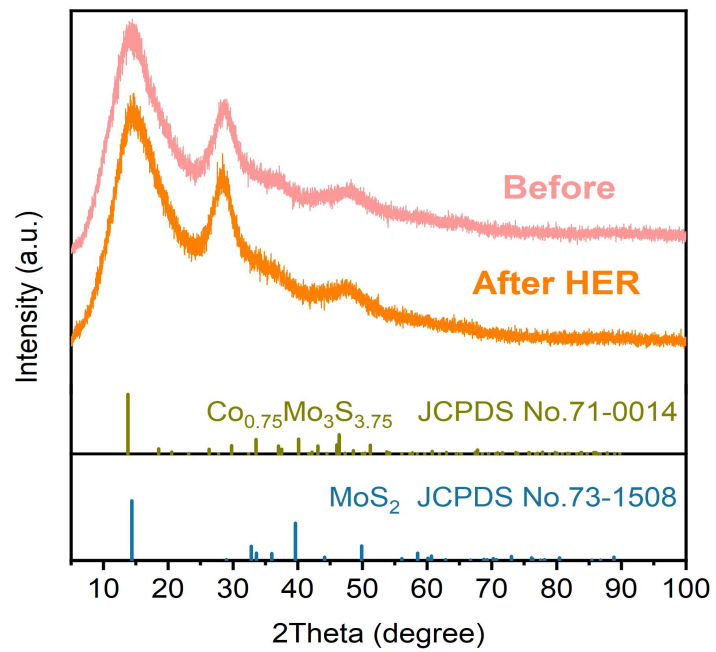

129

130 **Figure S12.** XRD patterns of NC-Co-MoS<sub>2</sub>/CC-450 electrocatalyst before and after

131 30 h HER reaction chronopotentiometry (CP) testing.

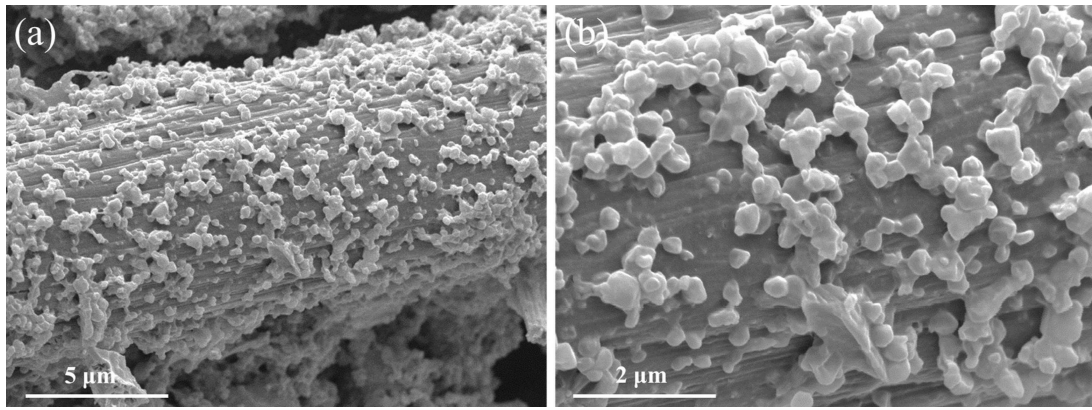

132

133 **Figure S13.** (a, b) SEM images of NC-Co-MoS<sub>2</sub>/CC-450 electrocatalyst after HER

134 chronopotentiometry (CP) stability testing.

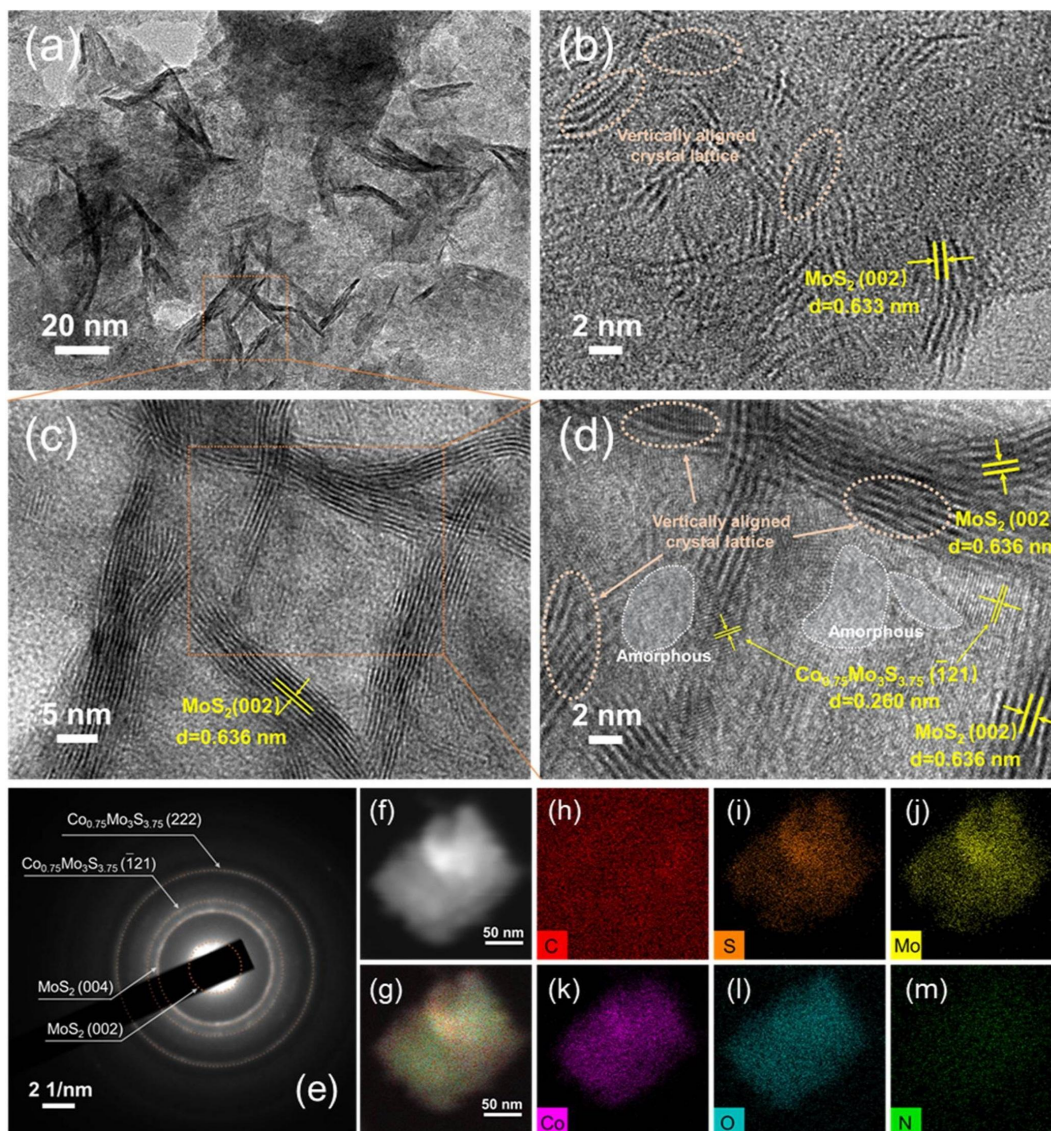

135

136 **Figure S14.** (a) TEM image; (b-e) HRTEM images and corresponding SAED images;

137 (f-m) HAADF-STEM images and corresponding EDS mapping images of

138 NC-Co-MoS<sub>2</sub>/CC-450 catalyst after stability testing.

139 Table S1. The loadings of NC-Co-MoS<sub>2</sub>/CC-n (n=400, 450, 500 and 550),

140 N-MoS<sub>2</sub>/CC, H-ZIF67/CC catalysts.

| Catalyst                       | Initial Bare carbon cloth | After annealing | Mass loading (mg cm <sup>-2</sup> ) |
|--------------------------------|---------------------------|-----------------|-------------------------------------|
| NC-Co-MoS <sub>2</sub> /CC-400 | 0.0972 g                  | 0.1164 g        | 2.40                                |
| NC-Co-MoS <sub>2</sub> /CC-450 | 0.0980 g                  | 0.1164 g        | 2.30                                |
| NC-Co-MoS <sub>2</sub> /CC-500 | 0.0993 g                  | 0.1167 g        | 2.18                                |
| NC-Co-MoS <sub>2</sub> /CC-550 | 0.0986 g                  | 0.1148 g        | 2.03                                |
| N-MoS <sub>2</sub> /CC         | 0.0978 g                  | 0.1124 g        | 1.83                                |
| H-ZIF67/CC                     | 0.0985 g                  | 0.1093 g        | 1.35                                |

141

142

143 Table S2. Elemental content corresponding to the elemental mapping for the SEM of

144 NC-Co-MoS<sub>2</sub>/CC-450.

| Element | Wt%   | Atomic percentage |
|---------|-------|-------------------|
| C       | 75.76 | 87.77             |
| S       | 7.39  | 3.21              |
| Mo      | 5.03  | 0.73              |
| Co      | 4.01  | 0.95              |
| O       | 3.29  | 2.86              |
| N       | 4.52  | 4.49              |

145

146 Table S3. Elemental content corresponding to the elemental mapping for the TEM of

147 NC-Co-MoS<sub>2</sub>/CC-450

| Element | Wt%   | Atomic percentage |
|---------|-------|-------------------|
| C       | 53.41 | 78.86             |
| S       | 14.08 | 7.72              |
| Mo      | 21.02 | 3.85              |
| Co      | 3.62  | 1.08              |
| O       | 6.62  | 7.28              |
| N       | 1.25  | 1.21              |

148

149

150

151 Table S4. C<sub>dl</sub> and ECSA values of NC-Co-MoS<sub>2</sub>/CC-n (n=400, 450, 500 and 550),

152 N-MoS<sub>2</sub>/CC, H-ZIF67/CC catalysts

| Catalyst                       | C <sub>dl</sub> (mF cm <sup>-2</sup> ) | ECSA (cm <sup>2</sup> ) |
|--------------------------------|----------------------------------------|-------------------------|
| NC-Co-MoS <sub>2</sub> /CC-400 | 76.38                                  | 1909.5                  |
| NC-Co-MoS <sub>2</sub> /CC-450 | 111.76                                 | 2794                    |
| NC-Co-MoS <sub>2</sub> /CC-500 | 97.62                                  | 2440.5                  |
| NC-Co-MoS <sub>2</sub> /CC-550 | 64.35                                  | 1608.75                 |
| N-MoS <sub>2</sub> /CC         | 68.27                                  | 1706.75                 |
| H-ZIF67/CC                     | 27.22                                  | 680.5                   |

153

154

155  
156Table S5. Comparison of the HER performances for NC-Co-MoS<sub>2</sub>/CC-450 with reported electrocatalysts in 1.0 M KOH

| Catalyst                                                | $\eta(\text{mV}) @ j = 10, 50, 100 (\text{mA cm}^{-2})$ | Tafel slope ( $\text{mV dec}^{-1}$ ) | Current collector | Reference                                                      |
|---------------------------------------------------------|---------------------------------------------------------|--------------------------------------|-------------------|----------------------------------------------------------------|
| NC-Co-MoS <sub>2</sub> /CC-450                          | $\eta_{10} = 56$                                        | 69.2                                 | carbon cloth      | This work                                                      |
|                                                         | $\eta_{50} = 114$                                       |                                      |                   |                                                                |
|                                                         | $\eta_{100} = 155$                                      |                                      |                   |                                                                |
| MoS <sub>2</sub> /CoS <sub>2</sub>                      | $\eta_{10} = 67$                                        | 70                                   | carbon cloth      | ACS Applied Energy Materials 2023, 6, 2479-2488 <sup>6</sup>   |
| CoS <sub>2</sub> /MoS <sub>2</sub> /NC                  | $\eta_{10} = 215$                                       | 80                                   | GCE               | Journal of Alloys and Compounds 2022, 891, 161962 <sup>7</sup> |
| 1T-Fe/P-WS <sub>2</sub> @CC                             | $\eta_{10} = 116$                                       | 65                                   | carbon cloth      | Appl. Catal. B-Environ. 2021, 286, 119897 <sup>8</sup>         |
| 1T-2H MoS <sub>2</sub> /CoS <sub>2</sub>                | $\eta_{10} = 37$                                        | 46                                   | carbon cloth      | J. Mater. Chem. A 2022, 10, 16115-16126 <sup>9</sup>           |
| Co <sub>9</sub> S <sub>8</sub> -MoS <sub>2</sub> /NF    | $\eta_{10} = 167$                                       | 81.7                                 | Nickel foam       | Adv. Funct. Mater. 2020, 30, 2002536 <sup>10</sup>             |
| CoS <sub>2</sub> -MoS <sub>2</sub>                      | $\eta_{10} = 130$                                       | 66.8                                 | GCE               | Applied Surface Science 2020, 527, 146847 <sup>11</sup>        |
| Ni <sub>3</sub> S <sub>2</sub> @MoS <sub>2</sub> /FeOOH | $\eta_{10} = 95$                                        | 49                                   | Nickel foam       | Appl. Catal. B-Environ. 2019, 244, 1004-1012 <sup>12</sup>     |
| CoS <sub>2</sub> /MoS <sub>2</sub> /RGO                 | $\eta_{10} = 160$                                       | 56                                   | GCE               | Applied Surface Science 2017, 412, 138-145 <sup>13</sup>       |
| N-MoS <sub>2</sub> /CN                                  | $\eta_{10} = 114$                                       | 46.8                                 | GEC               | J Am Chem Soc 2019, 141, 18578-18584 <sup>14</sup>             |
| MXene-MoS <sub>2</sub>                                  | $\eta_{10} = 69$                                        | 53                                   | GCE               | Nano Research 2023 <sup>15</sup>                               |
| CC/MOF-CoSe <sub>2</sub> @MoSe <sub>2</sub>             | $\eta_{10} = 69$                                        | 68.91                                | carbon cloth      | Chemical Engineering Journal 2022, 429, 132379 <sup>16</sup>   |
| CoS <sub>2</sub> /MoS <sub>2</sub> -3                   | $\eta_{10} = 163$                                       | 63                                   | GCE               | ChemistrySelect 2022, 7, e202202700 <sup>17</sup>              |
| Ni <sub>SA</sub> -MoS <sub>2</sub>                      | $\eta_{10} = 98$                                        | 75                                   | carbon cloth      | Nano Energy 2018, 53, 458-467 <sup>18</sup>                    |

|                        |                   |      |             |                                                   |
|------------------------|-------------------|------|-------------|---------------------------------------------------|
| C+MoS <sub>2</sub> @NF | $\eta_{10} = 120$ | 41.8 | Nickel foam | Adv. Funct. Mater.<br>2023, 2214085 <sup>19</sup> |
|------------------------|-------------------|------|-------------|---------------------------------------------------|

157

158

159

160 **References**

- 161 1. A. W. Müller, V.; Krickemeyer, E.; Bögge, H.; Lemke, M., *Z. Anorg. Allg. Chem.*,  
162 1991, **601**, 175-188.
- 163 2. S. Wang, P. Yang, X. Sun, H. Xing, J. Hu, P. Chen, Z. Cui, W. Zhu and Z. Ma,  
164 *Appl. Catal. B-Environ.*, 2021, **297**, 120386.
- 165 3. Y. Wang, G. Qian, Q. Xu, H. Zhang, F. Shen, L. Luo and S. Yin, *Appl. Catal.*  
166 *B-Environ.*, 2021, **286**, 119881.
- 167 4. X. Yin, R. Cai, X. Dai, F. Nie, Y. Gan, Y. Ye, Z. Ren, Y. Liu, B. Wu, Y. Cao and  
168 X. Zhang, *J. Mater. Chem. A*, 2022, **10**, 11386-11393.
- 169 5. H. Wen, L. Y. Gan, H. B. Dai, X. P. Wen, L. S. Wu, H. Wu and P. Wang, *Appl.*  
170 *Catal. B-Environ.*, 2019, **241**, 292-298.
- 171 6. Y. Zhu, J. Yao, L. Bai, W. Zhang, W. Wang, X. Ma and L. Wu, *ACS Appl. Energy*  
172 *Mater.*, 2023, **6**, 2479-2488.
- 173 7. K. Ji, K. Matras-Postolek, R. Shi, L. Chen, Q. Che, J. Wang, Y. Yue and P. Yang,  
174 *J. Alloys Compd.*, 2022, **891**, 161962.
- 175 8. D. R. Paudel, U. N. Pan, T. I. Singh, C. C. Gudal, N. H. Kim and J. H. Lee, *Appl.*  
176 *Catal. B-Environ.*, 2021, **286**, 119897.
- 177 9. P. Chang, T. Wang, Z. Liu, X. Wang, J. Zhang, H. Xiao, L. Guan and J. Tao, *J.*  
178 *Mater. Chem. A*, 2022, **10**, 16115-16126.
- 179 10. M. Kim, M. A. R. Anjum, M. Choi, H. Y. Jeong, S. H. Choi, N. Park and J. S.  
180 Lee, *Adv. Funct. Mater.*, 2020, **30**, 2002536.
- 181 11. Y. Zhou, W. Zhang, M. Zhang, X. Shen, Z. Zhang, X. Meng, X. Shen, X. Zeng  
182 and M. Zhou, *Appl. Surf. Sci.*, 2020, **527**, 146847.



- 183 12. M. Zheng, K. Guo, W. J. Jiang, T. Tang, X. Wang, P. Zhou, J. Du, Y. Zhao, C. Xu  
184 and J.-S. Hu, *Appl. Catal. B-Environ.*, 2019, **244**, 1004-1012.
- 185 13. Y. R. Liu, X. Shang, W. K. Gao, B. Dong, J. Q. Chi, X. Li, K. L. Yan, Y. M. Chai,  
186 Y. Q. Liu and C. G. Liu, *Appl. Surf. Sci.*, 2017, **412**, 138-145.
- 187 14. H. Wang, X. Xiao, S. Liu, C. L. Chiang, X. Kuai, C. K. Peng, Y. C. Lin, X. Meng,  
188 J. Zhao, J. Choi, Y. G. Lin, J. M. Lee and L. Gao, *J. Am. Chem. Soc.*, 2019, **141**,  
189 18578-18584.
- 190 15. R. Zhang, Y. Sun, F. Jiao, L. Li, D. Geng and W. Hu, *Nano Res.*, 2023, DOI:  
191 10.1007/s12274-023-5602-5.
- 192 16. S. J. Patil, N. R. Chodankar, S. K. Hwang, P. A. Shinde, G. Seeta Rama Raju, K.  
193 Shanmugam Ranjith, Y. S. Huh and Y.-K. Han, *Chem. Eng. J.*, 2022, **429**,  
194 132379.
- 195 17. J. Xiong, Z. Cao, H. Wang, D. Ban, Z. Zhou, Y. Li and S. Chen, *ChemistrySelect*,  
196 2022, **7**, e202202700
- 197 18. Q. Wang, Z. L. Zhao, S. Dong, D. He, M. J. Lawrence, S. Han, C. Cai, S. Xiang,  
198 P. Rodriguez, B. Xiang, Z. Wang, Y. Liang and M. Gu, *Nano Energy*, 2018, **53**,  
199 458-467.
- 200 19. B. Gao, Y. Zhao, X. Du, D. Qian, S. Ding, C. Xiao, J. Wang, Z. Song and H. W.  
201 Jang, *Adv. Funct. Mater.*, 2023, DOI: 10.1002/adfm.202214085, 2214085.  
202
